# Supplementary material for: Präoperative Nüchternheit bei Kindern – Erfahrungen bei Einführung eines liberalen Nüchternheitsgebotes
Source: Springer Nature journal article supplement (doi:10.1007/s00101-023-01303-2), 2023-06-28
Supplement: MOESM1 [file 25547308]

## Erhebungsbogen für den OP „Optimierte präoperative Nüchternheit bei Kindern“

|                                                                 |                                                                                                                                                                   |
|-----------------------------------------------------------------|-------------------------------------------------------------------------------------------------------------------------------------------------------------------|
| Datum:                                                          | Alter des Kindes: Jahre; Gewicht: kg                                                                                                                              |
| OP-Nr.:                                                         | Geschlecht: <input type="checkbox"/> m <input type="checkbox"/> w                                                                                                 |
| Nüchternheit präoperativ Nahrung/ Milch:                        | / Stunden (vor Beginn Anästhesiemaßn.)                                                                                                                            |
| Nüchternheit präoperativ klare Flüssigkeit:                     | Stunden (vor Beginn Anästhesiemaßn.)                                                                                                                              |
| Zufriedenheit Nüchternheitsregelung präop.<br>(Schulnoten 1-6): | <input type="checkbox"/> 1 <input type="checkbox"/> 2 <input type="checkbox"/> 3 <input type="checkbox"/> 4 <input type="checkbox"/> 5 <input type="checkbox"/> 6 |
| Nüchternheit postoperativ:                                      | Stunden (1.Flüssigkeitsaufn. nach ANÄ)                                                                                                                            |

|                                                                                   |                                                                                                                                                                                                                                                                                                                         |
|-----------------------------------------------------------------------------------|-------------------------------------------------------------------------------------------------------------------------------------------------------------------------------------------------------------------------------------------------------------------------------------------------------------------------|
| PAED-Skala Agitationskriterien                                                    | 0 (gar nicht) 1 (ein wenig) 2 (etwas mehr) 3 (viel) 4 (sehr viel)                                                                                                                                                                                                                                                       |
| Unruhe/ Agitation präoperativ (PAED-Skala)<br>Bei Kontakt Anästhesie-Team         | ist unruhig/ ruhelos: <input type="checkbox"/> 0 <input type="checkbox"/> 1 <input type="checkbox"/> 2 <input type="checkbox"/> 3 <input type="checkbox"/> 4<br>ist untröstlich: <input type="checkbox"/> 0 <input type="checkbox"/> 1 <input type="checkbox"/> 2 <input type="checkbox"/> 3 <input type="checkbox"/> 4 |
| Unruhe/ Agitation postoperativ (PAED-Skala)<br>30 min nach Narkoseende            | ist unruhig/ ruhelos: <input type="checkbox"/> 0 <input type="checkbox"/> 1 <input type="checkbox"/> 2 <input type="checkbox"/> 3 <input type="checkbox"/> 4<br>ist untröstlich: <input type="checkbox"/> 0 <input type="checkbox"/> 1 <input type="checkbox"/> 2 <input type="checkbox"/> 3 <input type="checkbox"/> 4 |
| Unruhe/ Agitation postoperativ (PAED-Skala)<br>Bei Abholung: min nach Narkoseende | ist unruhig/ ruhelos: <input type="checkbox"/> 0 <input type="checkbox"/> 1 <input type="checkbox"/> 2 <input type="checkbox"/> 3 <input type="checkbox"/> 4<br>ist untröstlich: <input type="checkbox"/> 0 <input type="checkbox"/> 1 <input type="checkbox"/> 2 <input type="checkbox"/> 3 <input type="checkbox"/> 4 |
| Agitation/ Delir in Vorgeschichte                                                 | <input type="checkbox"/> ja <input type="checkbox"/> nein                                                                                                                                                                                                                                                               |

|                                       |                                                                                                    |
|---------------------------------------|----------------------------------------------------------------------------------------------------|
| PONV im AWR                           | <input type="checkbox"/> Übelkeit <input type="checkbox"/> Erbrechen                               |
| PONV auf Station                      | <input type="checkbox"/> Übelkeit <input type="checkbox"/> Erbrechen                               |
| PONV in Vorgeschichte                 | <input type="checkbox"/> ja <input type="checkbox"/> nein                                          |
| Art des Eingriffs                     | <input type="checkbox"/> abdominell <input type="checkbox"/> HNO <input type="checkbox"/> sonstige |
| Wartezeit auf Transport (Verzögerung) | Minuten                                                                                            |

|                                                                                  |                                                                                                                                            |
|----------------------------------------------------------------------------------|--------------------------------------------------------------------------------------------------------------------------------------------|
| Anzahl der Versuche i.v. Zugang:                                                 | mal<br><input type="checkbox"/> Maskeneinleitung (schwierige Venensituation)<br><input type="checkbox"/> bekannter schwieriger Venenstatus |
| Erste Blutdruckmessung nach Einleitung                                           | / ( ) mmHg                                                                                                                                 |
| Therapiebedürftige Hypotension nach<br>Narkoseeinleitung (OHNE Kaudalanästhesie) | <input type="checkbox"/> ja <input type="checkbox"/> nein                                                                                  |
| Kommentar                                                                        |                                                                                                                                            |

|                                   |                   |
|-----------------------------------|-------------------|
| Blutzucker: mg/ dl                | Hämoglobin: g/ dl |
| Standardbikarbonat/ BE: mmol/ l / | pH-Wert:          |
